# Supplementary material for: Tracing the origins of stratospheric ozone intrusions and their impacts on Central and Eastern China: a long-term study of direct and indirect pathways
Source: Copernicus journal article supplement (doi:10.5194/egusphere-2024-930), 2024-05-03
Supplement: Supplementary file 1 [file egusphere-2024-930-supplement.pdf]

**Table S1 Impacts of various critical source areas (CSAs) on the six sub-regions of the CEC**

|                            |                           |                           | NE            | NC   | LP    | CC   | EC   | SC   |      |
|----------------------------|---------------------------|---------------------------|---------------|------|-------|------|------|------|------|
| <b>Indirect intrusions</b> | <b>Middle troposphere</b> | <b>CSAm1</b>              | 4.68          | 7.00 | 10.24 | 2.89 | 3.73 | 0.86 |      |
|                            |                           | <b>CSAm2</b>              | 0.13          | 0.14 | 0.09  | 0.31 | 0.46 | 0.63 |      |
|                            | <b>Lower troposphere</b>  | <b>CSAI1</b>              | 1.16          | 2.09 | 1.40  | 1.31 | 1.83 | 0.41 |      |
|                            |                           | <b>CSAI2</b>              | 0.84          | 1.36 | 1.56  | 1.87 | 1.38 | 0.39 |      |
|                            |                           | <b>CSAI3</b>              | 0.73          | 0.51 | 0.14  | 0.07 | 0.11 | 0.01 |      |
|                            |                           | <b>CSAI4</b>              | 0.08          | 0.19 | 0.02  | 0.07 | 0.17 | 0.09 |      |
|                            | <b>Direct intrusions</b>  | <b>Middle troposphere</b> | <b>2CSAm1</b> | 1.64 | 4.15  | 5.99 | 1.02 | 1.12 | 0.10 |
|                            |                           |                           | <b>2CSAm2</b> | 1.04 | 1.78  | 0.73 | 1.52 | 2.48 | 0.53 |
| <b>Lower troposphere</b>   |                           | <b>2CSAI1</b>             | 0.25          | 0.04 | 0.01  | 0.01 | 0.03 | 0.00 |      |
|                            |                           | <b>2CSAI2</b>             | 0.13          | 0.35 | 0.39  | 0.13 | 0.24 | 0.00 |      |

*Note.* NE (NorthEast China); NC (North China); LP (Loess Plateau); CC (Central China); EC (East China); SC (Southern China).

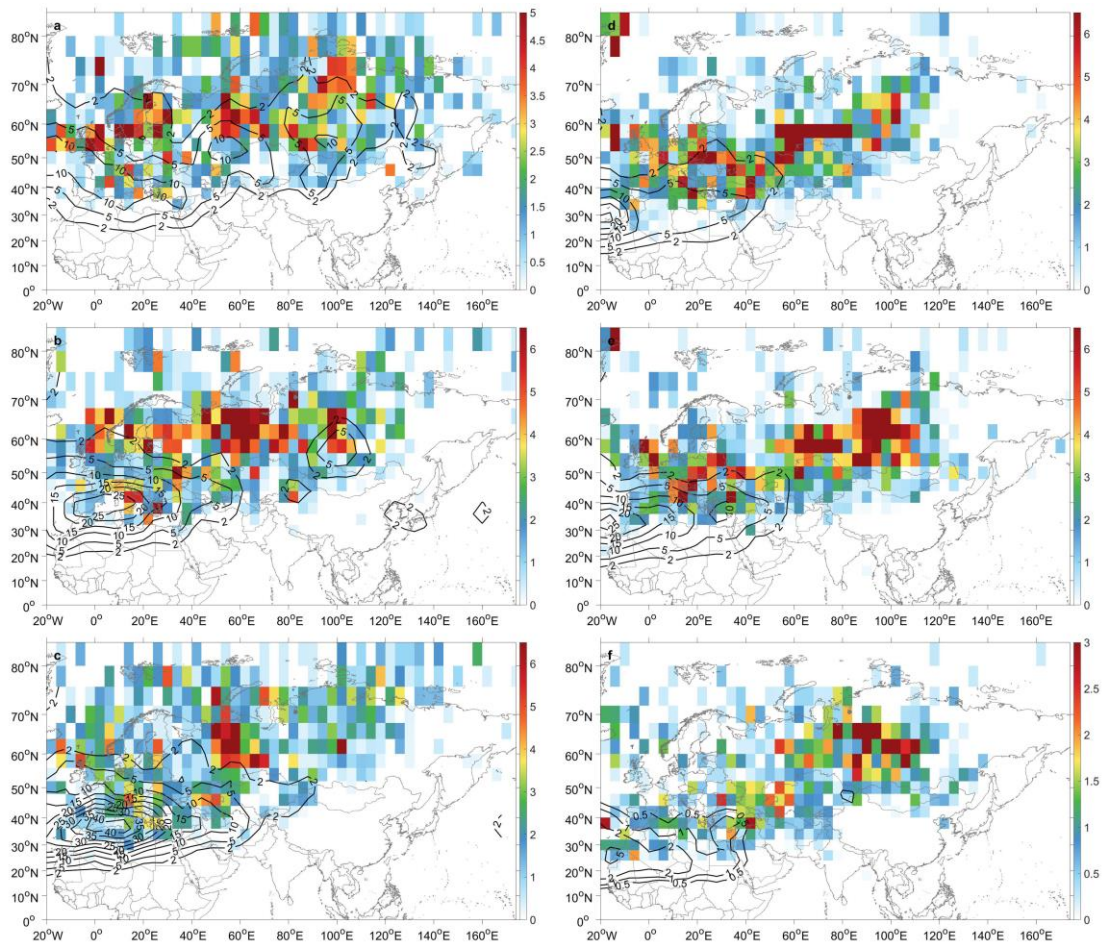

**Figure S1: Distributions of CSAII for ISI intruding the lower troposphere (color shaded) and middle troposphere (black lines) of a) NE, b) NC, c) LP, d) CC, e) EC and f) SC in May in 2019.**

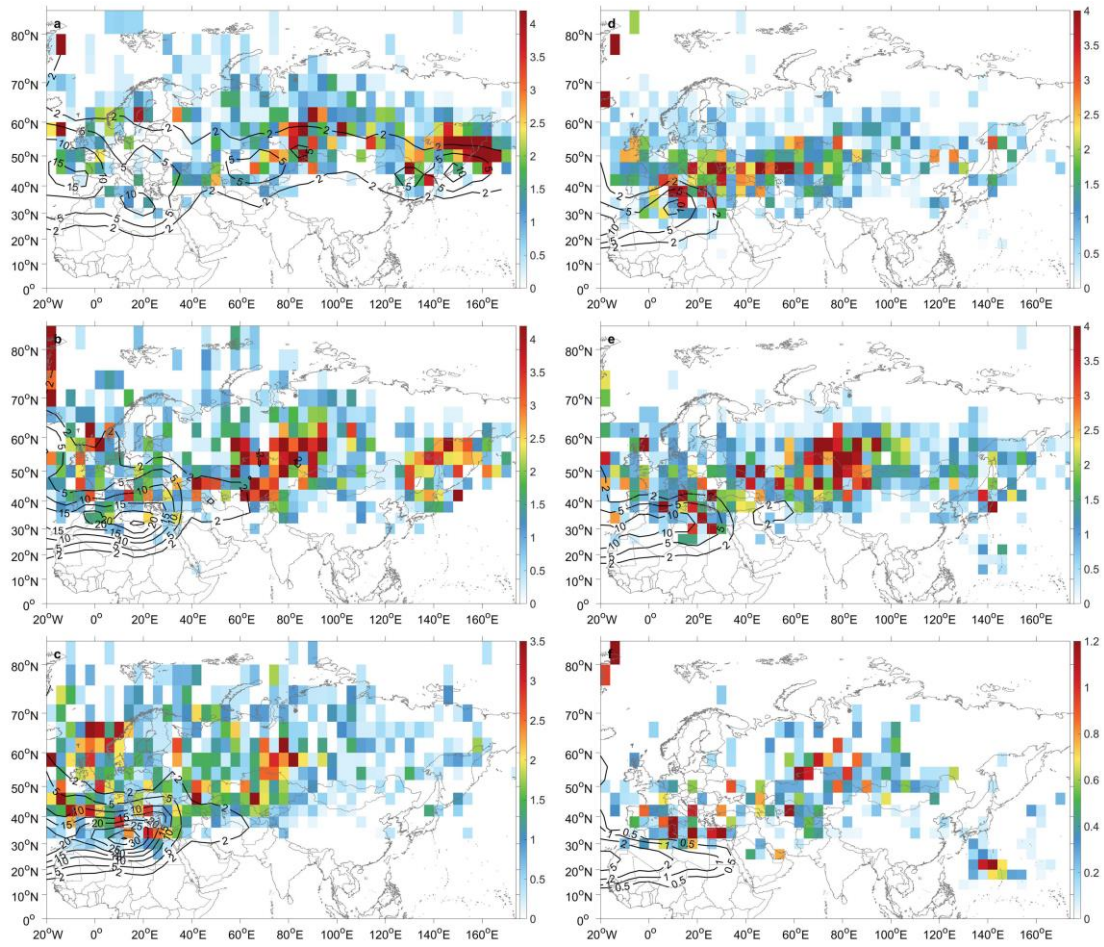

Figure S2: Same as Fig. S1 but for June.

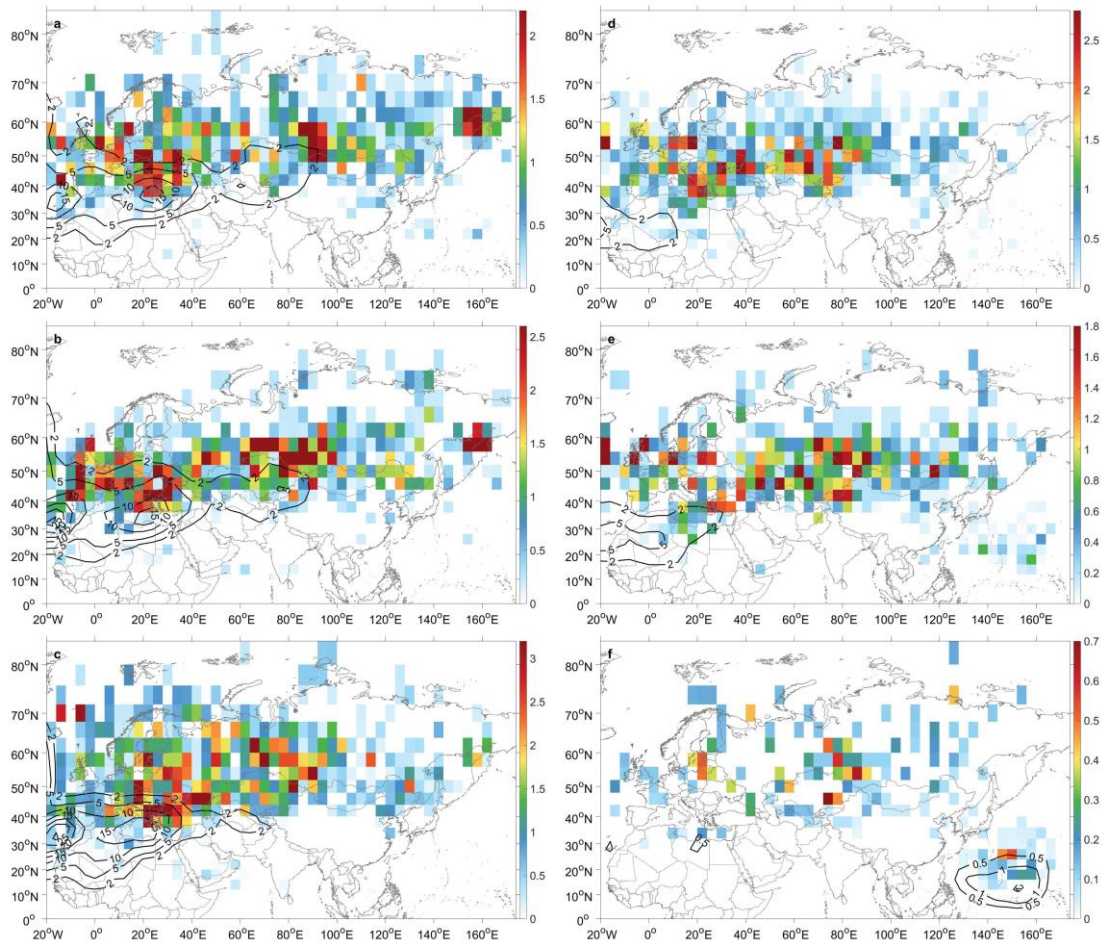

**Figure S3: Same as Fig. S1 but for July.**



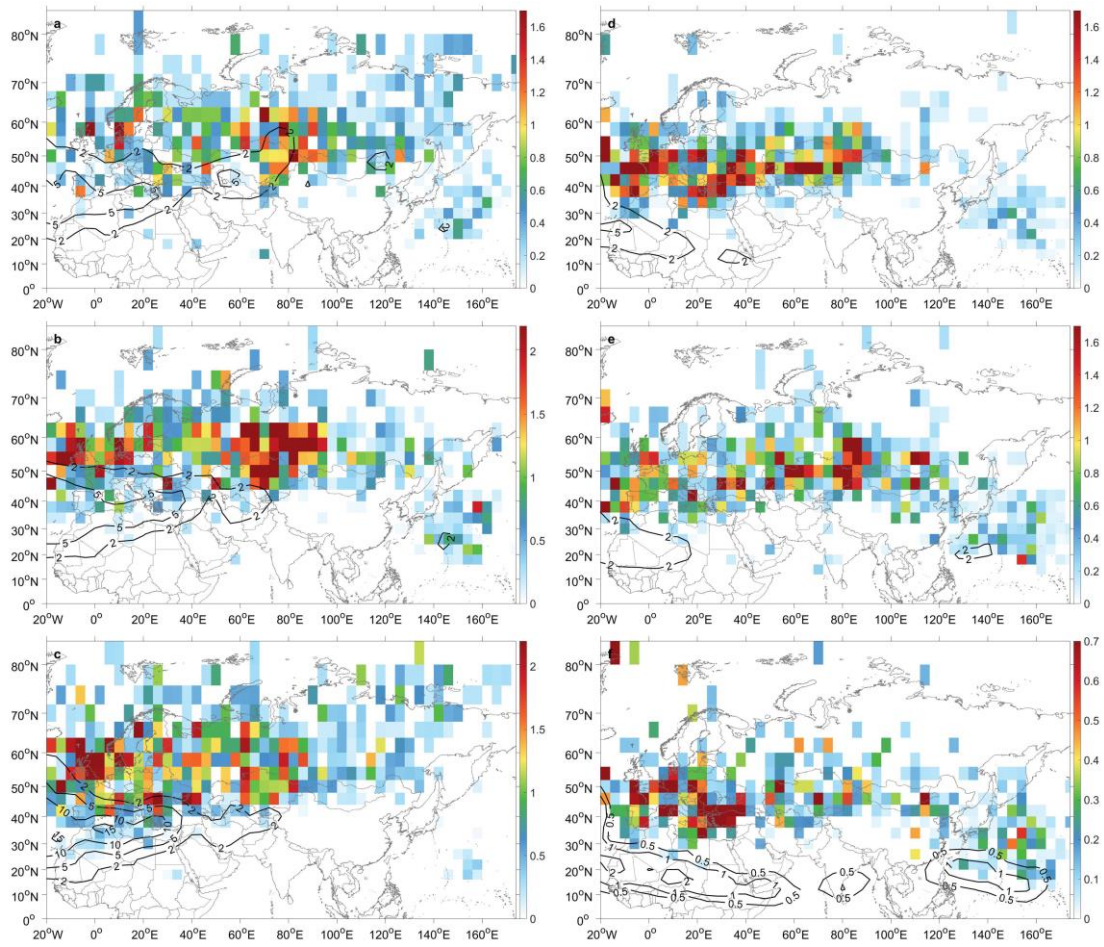

**Figure S4: Same as Fig. S1 but for August.**

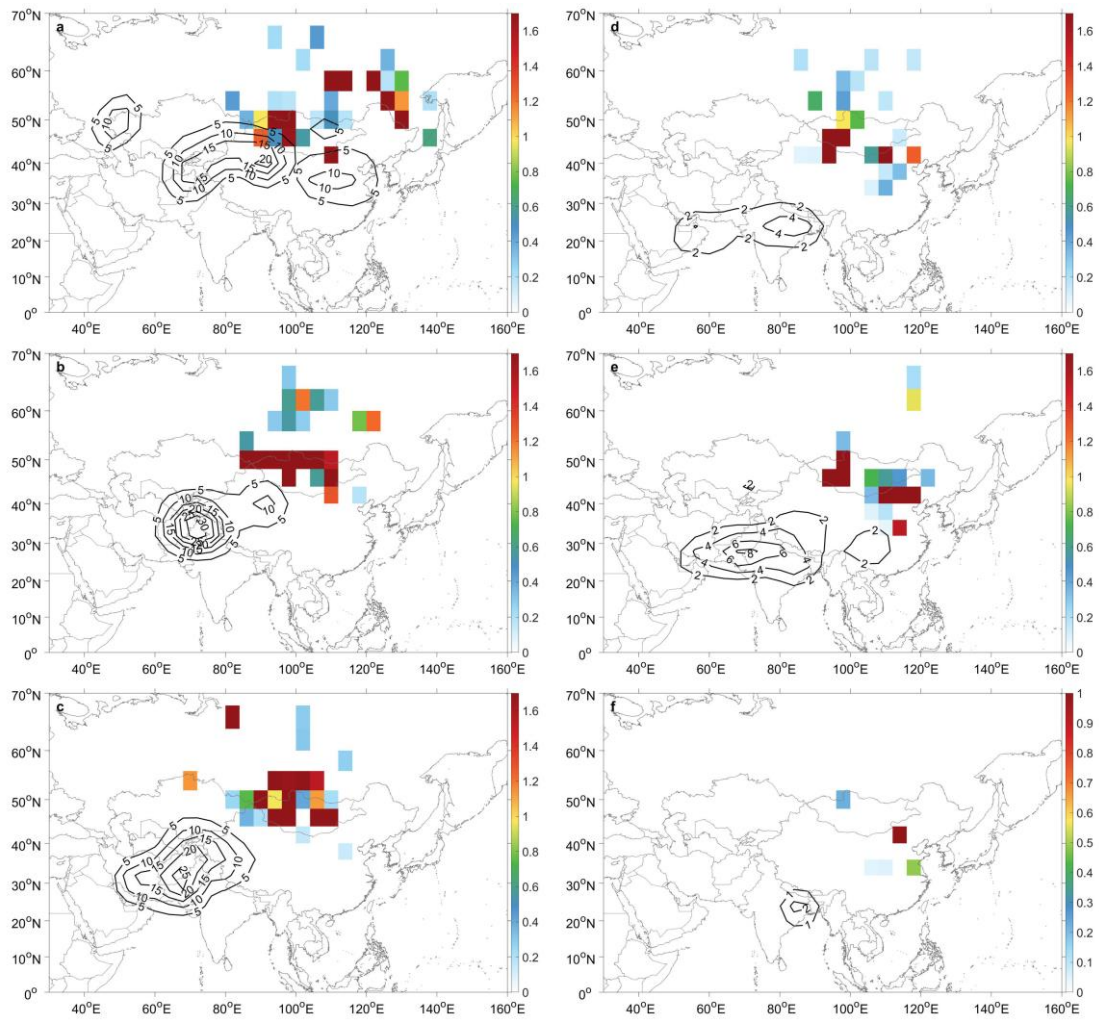

**Figure S5: Distributions of CSII for DSI intruding the lower troposphere (color shaded) and middle troposphere (black lines) of a) NE, b) NC, c) LP, d) CC, e) EC and f) SC in May in 2019.**

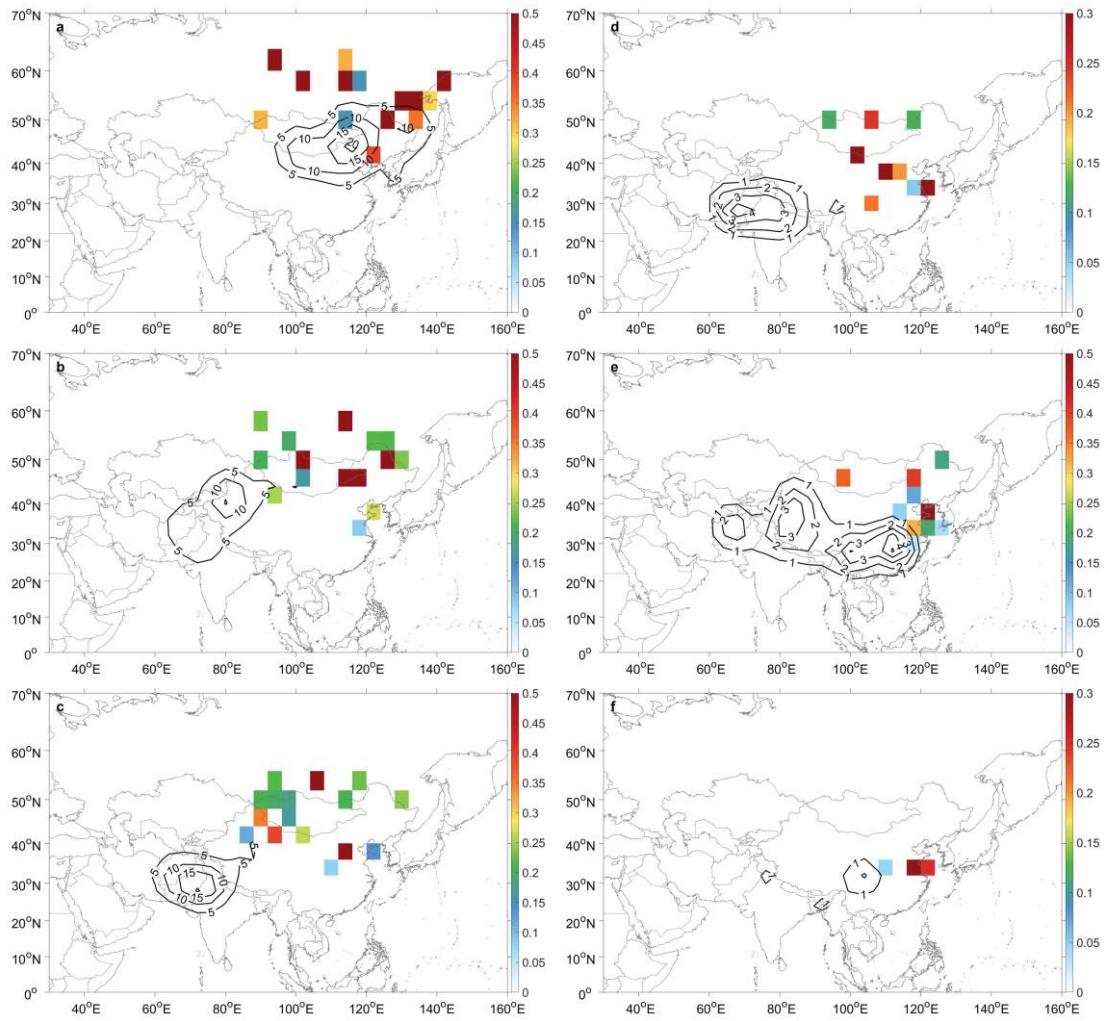

**Figure S6: Same as Fig. S5 but for June.**

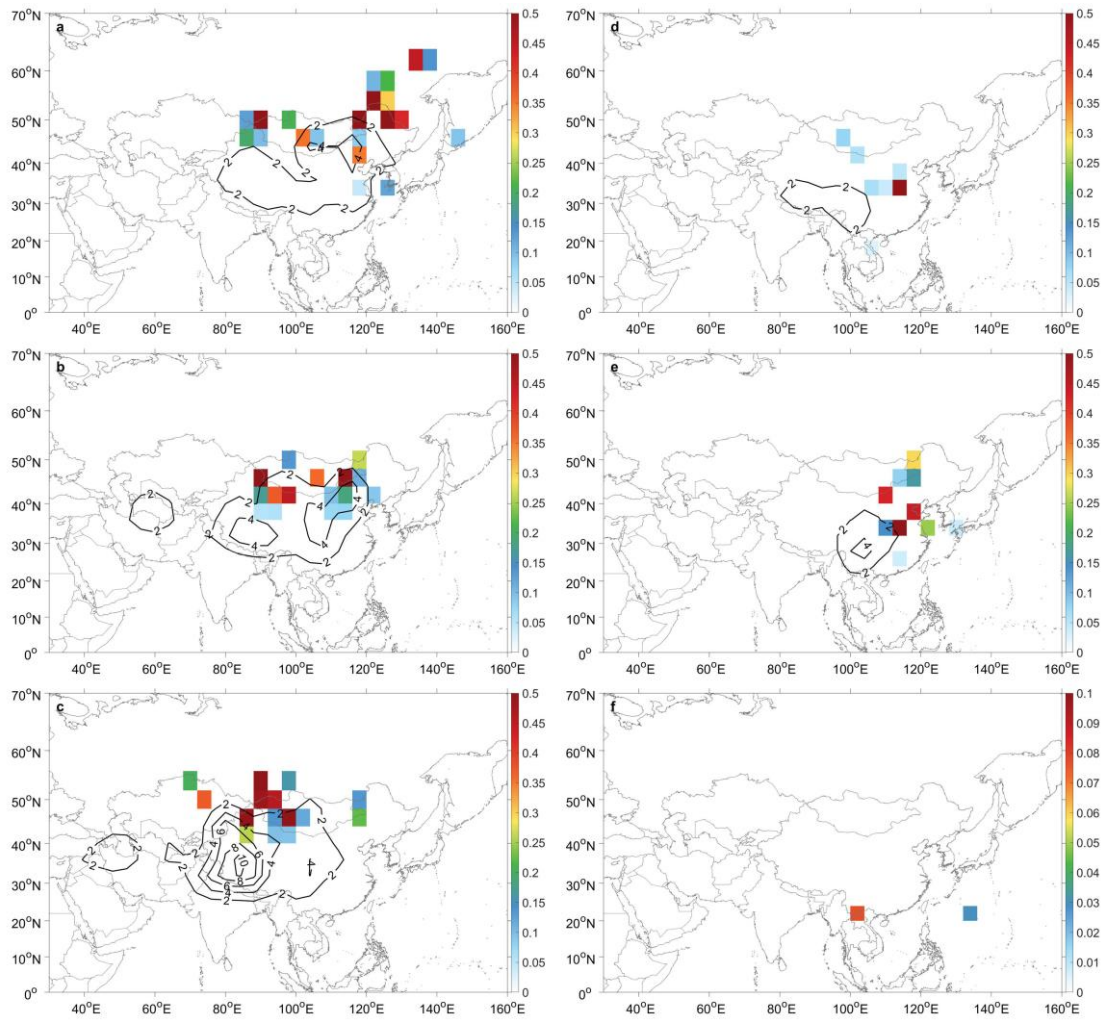

Figure S7: Same as Fig. S5 but for July.



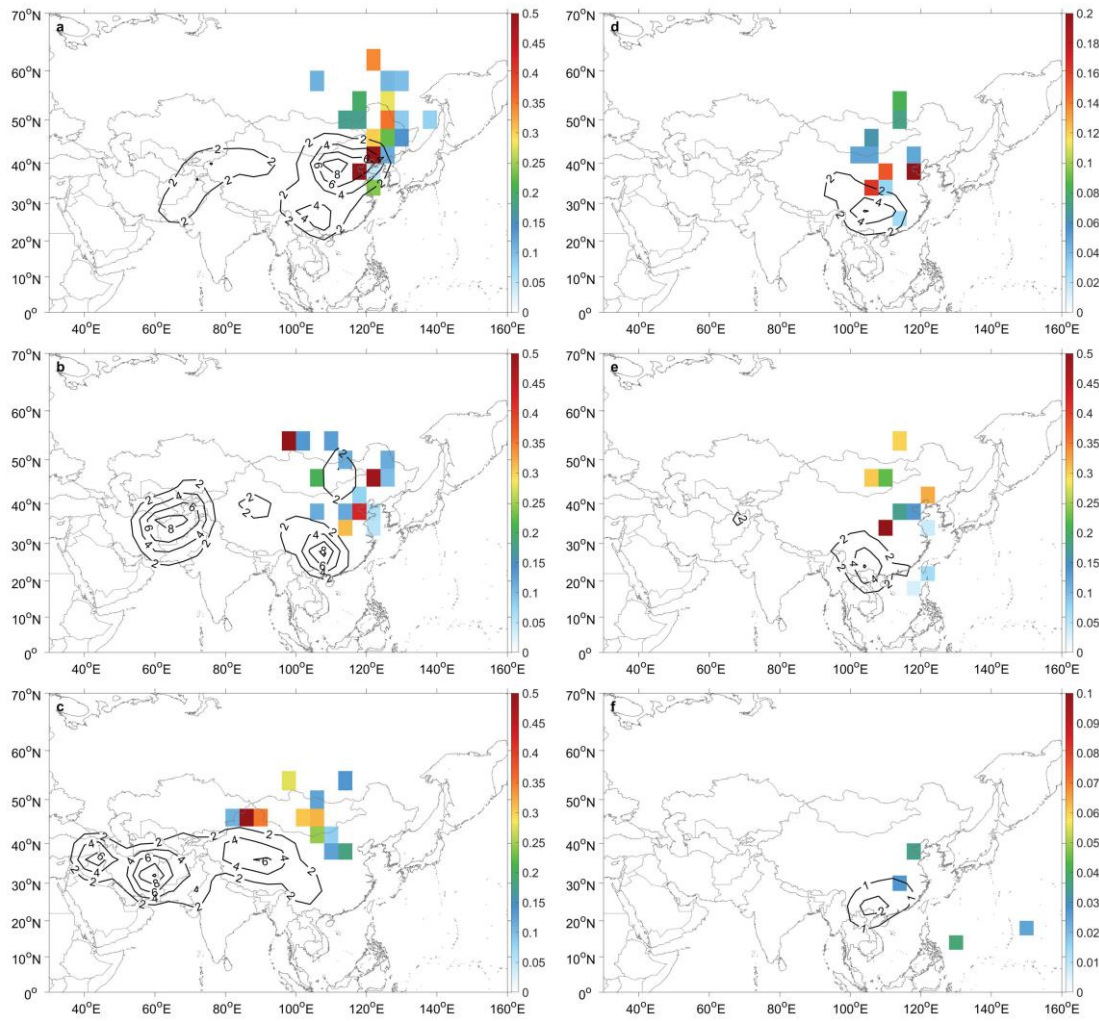

**Figure S8: Same as Fig. S5 but for August.**
